# Supplementary material for: A data-mining approach to understanding the impact of multi-doping on the ionic transport mechanism of solid electrolytes materials: the case of dual-doped Ga0.15/Scy Li7La3Zr2O12
Source: Royal Society of Chemistry journal article supplement (doi:10.1039/d3ta07036k), 2024-01-01
Supplement: d3ta07036k1.pdf [file d3ta07036k1.pdf]

## Supporting Information

### A Data-Mining Approach to Understanding the Impact of Multi-doping on the Ionic Transport Mechanism of Solid Electrolytes Materials: The Case of dual-doped $\text{Ga}_{0.15}/\text{Sc}_y\text{-Li}_7\text{La}_3\text{Zr}_2\text{O}_{12}$

Henry A. Cortés<sup>1</sup>, Mauricio R. Bonilla<sup>1</sup>, Herbert Früchtl<sup>2</sup>, Tanja van Mourik<sup>2</sup>, Javier Carrasco<sup>3,4</sup>, and Elena Akhmatkaya<sup>1,4</sup>

<sup>1</sup>BCAM - Basque Center for Applied Mathematics, Alameda de Mazarredo 14, E-48009 Bilbao, Spain

<sup>2</sup>EaStCHEM School of Chemistry, University of St Andrews, St Andrews, United Kingdom

<sup>3</sup>Centre for Cooperative Research on Alternative Energies (CIC energiGUNE), Basque Research and Technology Alliance (BRTA), Alava Technology Park, Albert Einstein 48, 01510, Vitoria-Gasteiz, Spain

<sup>4</sup>IKERBASQUE, Basque Foundation for Science, Plaza Euskadi 5, 48009 Bilbao, Spain

# S1. Force-field database and validation.

## S1.1 DFT Database

The database of structures employed to adjust the Buckingham potential parameters (see Table 1 of the main text) is summarized in Table S1. The energies, stresses, and forces were extracted using density functional theory (DFT). All structures consist of 8 formula units (f.u.) of substituted LLZO. For a temperature  $T = 0$  K, the structures were subjected to energy minimization at constant volume (i.e., ions were allowed to move while the cell parameters remained fixed). For  $T > 0$  K, the structures were extracted from 2 ps long *ab initio* molecular dynamics (MD) simulations. 0% $T_d$  and 100% $T_d$  correspond to structures in which all Ga ions are located in octahedral ( $O_h$ ) or tetrahedral ( $T_d$ )  $Li^+$  sites, respectively.

Table S1: Number of structures employed to adjust the Buckingham potential for  $Ga_{0.15}/Sc_y$ - $Li_7La_3Zr_2O_{12}$ .

| LLZO 8 f.u.                           | $T(K)$ | 100% $T_d$ | 0% $T_d$ | Total |
|---------------------------------------|--------|------------|----------|-------|
| $Li_{53}Ga_1La_{24}Zr_{15}O_{96}$     | 0      | 306        | 209      | 525   |
| $Li_{53}Ga_1La_{24}Zr_{15}O_{96}$     | 900    | 500        | 500      | 1000  |
| $Li_{53}Ga_1La_{24}Zr_{15}O_{96}$     | 1000   | 100        | 100      | 200   |
| $Li_{54}Ga_1La_{24}Zr_{15}Sc_1O_{96}$ | 0      | 60         | 64       | 124   |
| $Li_{54}Ga_1La_{24}Zr_{15}Sc_1O_{96}$ | 900    | 500        | 500      | 1000  |
| $Li_{54}Ga_1La_{24}Zr_{15}Sc_1O_{96}$ | 1000   | 100        | 100      | 200   |
|                                       |        |            | Total    | 3049  |

## S1.2 Force field validation

Figure 3 in the main text presents validation results for the lattice constant ( $a$ ) and conductivity ( $\sigma$ ) of dual doped- $Ga_{0.15}/Sc_y$  LLZO, which are compared with the experimental values reported by Buannic et al. [1]. In this section, we compare the estimated values of  $a$  and  $\sigma$  for Sc-free  $Ga_x$ -doped LLZO with those presented in several experimental works for a range of the Ga content,  $x$  (Figure S1).



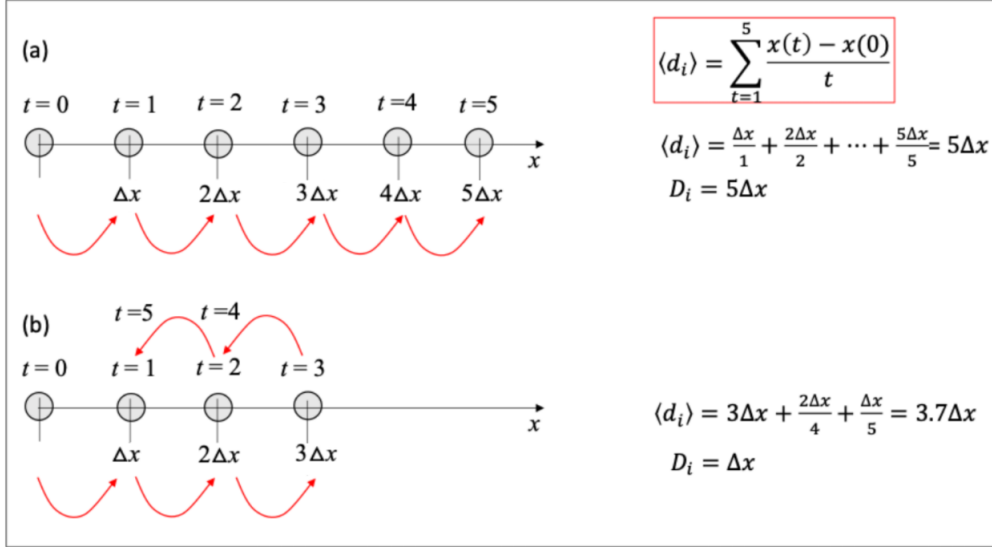

Figure S2: Average displacement ( $\langle d_i \rangle$ ) vs. Total displacement ( $D_i$ ) - a schematic representation.

In both scenarios (a) and (b), a particle moves in one dimension and performs a jump of length  $\Delta x$  at each time step, for a total simulation time of 5. In (a), the particle moves monotonically away from its initial position. Thus,  $\langle d_i \rangle = D_i = 5\Delta x$ , and  $i$  will be classified as a high mobility ion. In (b), the particle retraces its path at  $t = 4$ . Thus,  $\langle d_i \rangle = 3.7\Delta x$ , while  $D_i = \Delta x$ . Whereas the total displacement would suggest that  $i$  is a low mobility ion,  $\langle d_i \rangle$  correctly indicates that  $i$  is actually a “middle” mobility ion that, due to stochasticity finished its trajectory at  $t_{total} = 5$  close to the origin.

### b. Clustering with $k$ -Means:

The  $k$ -means algorithm is applied to the set of  $\{\langle d_i \rangle\}_{i=1,N}$  values, where  $N$  is the number of  $\text{Li}^+$  ions. In  $k$ -means clustering, data points (in this case,  $\langle d_i \rangle$ ) are grouped into a specified number of clusters ( $k$ ). The algorithm iteratively assigns each ion to one of the  $k$  clusters based on the closeness of its  $\langle d_i \rangle$  value to the cluster’s mean (centroid). This process continues until the assignment of ions to clusters stabilizes (i.e., further iterations do not significantly change the composition of the clusters).

### c. Elbow Method for Determining the Number of Clusters ( $k$ ):

The elbow method was used to determine the optimal number of clusters ( $k = 3$  in this case). It involves running the  $k$ -means clustering algorithm for a range of  $k$  values (1 to 9) and calculating the sum of squared distances from each point to its assigned center (also known as Within-Cluster-Sum-of-Squares). Then, it looks for the “Elbow Point” (see Figure S3), where the

rate of decrease changes sharply. This point is considered an indicator of the appropriate number of clusters.

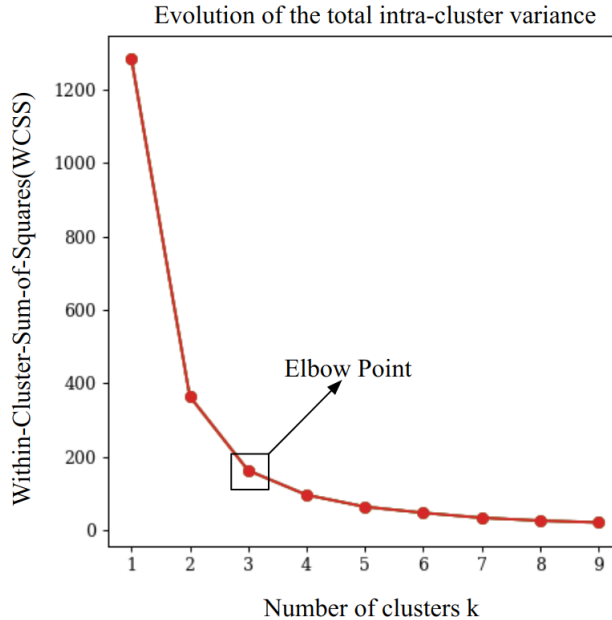

Figure S3: The evolution of the Within-Cluster-Sum-of-Squares (WCSS) versus the number of clusters  $k$ , with the ‘Elbow Point’ highlighted.

### S3. Site analysis validation.

#### S3.1 Site identification and characterization

We have validated our DM-based site identification approach (Figure 2 of the main text) by analyzing undoped cubic LLZO with a  $3 \times 3 \times 3$  supercell. Figure S4 displays the cluster map associated with the Li-ion density. Each cluster corresponds to an individual  $\text{Li}^+$  site, identified with a distinct color to facilitate visualization. The cluster map is entirely derived from MD trajectories without *a priori* knowledge of the system structure.

### Cluster Map

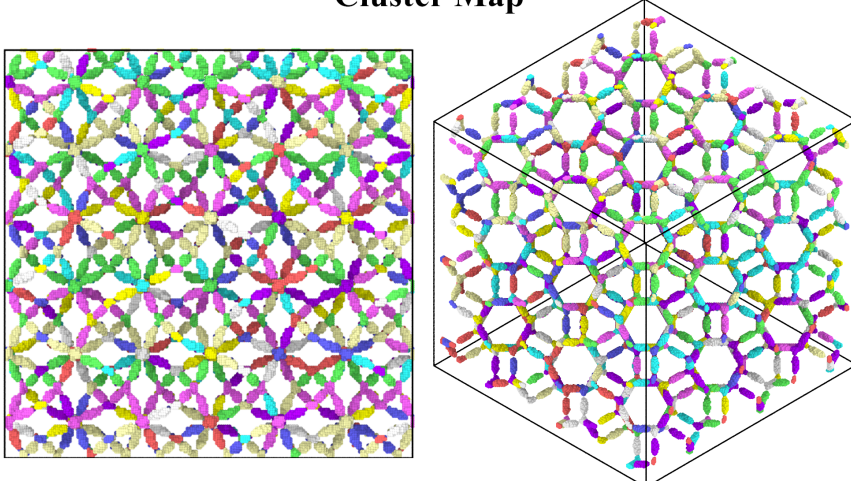

Figure S4: Cluster map of the undoped cubic LLZO  $3 \times 3 \times 3$  supercell in the (001) and (111) orientations.

The cluster map enables the calculation of site volumes (which are proportional to numbers of voxels in each cluster), site amplitude (which is a measure of the characteristic size of the site), the number of nearest neighbors (NN) for each site, and the site occupancy as follows:

- **Volume:** It is calculated by multiplying the number of voxels comprising the cluster by the size of each voxel. Notably, this particular calculation is also integral in establishing the density cutoff  $\rho_{cut}$  as described in the main text (see Figure 2 of main text).
- **Amplitude:** It is calculated by locating the cluster's centroid and subsequently measuring the distance from the centroid to the farthest voxel within the cluster.
- **Number of NN:** It is determined by counting the sites within a specified cutoff distance,  $d_{cut}$ , which is determined as

$$d_{cut} = \langle A_{site_1} \rangle + \langle A_{site_2} \rangle + (\langle A_{site_1} \rangle + \langle A_{site_2} \rangle) * 0.5, \quad (1)$$

where  $\langle A_{site_1} \rangle$  and  $\langle A_{site_2} \rangle$  are the average amplitudes of the two types of adjacent sites, and  $(\langle A_{site_1} \rangle + \langle A_{site_2} \rangle) * 0.5$  is an extra term accounting for the interstitial space between them.

- **Occupancy:** It is determined by summing the density of all the voxels within the cluster, that is:

$$O_{site} = \sum_{i=1}^c \rho_i, \quad (2)$$

where  $O_{site}$  is the occupancy by site,  $c$  is the number of voxels forming the cluster, and  $\rho_i$  is the density in each voxel  $i$ .

Figure S5 (a) shows the number of voxels within each cluster. This data provides a clear differentiation between two types of sites, Type 0 and Type 1, denoted as black and red dots. Figures S5 (b) and (c) present the amplitudes and NN associated with the Type 0 and Type 1 sites.

In Figure S5 (a), we can observe the distribution of the number of voxels within each cluster, facilitating a clear distinction between two categories of sites: Type 0 and Type 1, represented by black and red dots, respectively. In Figures S5 (b) and (c), we delve deeper into the characteristics of these two site types, examining their amplitudes and number of NN.

Type 0 sites (black dots) exhibit an average amplitude of approximately 0.65 Å and are surrounded by 4 NN, aligning with the known characteristics of  $T_d$  sites [13]. In contrast, Type 1 sites (red dots) display an average site amplitude of around 1.1 Å and maintain 2 NN, in perfect agreement with the distinctive features attributed to  $O_h$  sites [13].

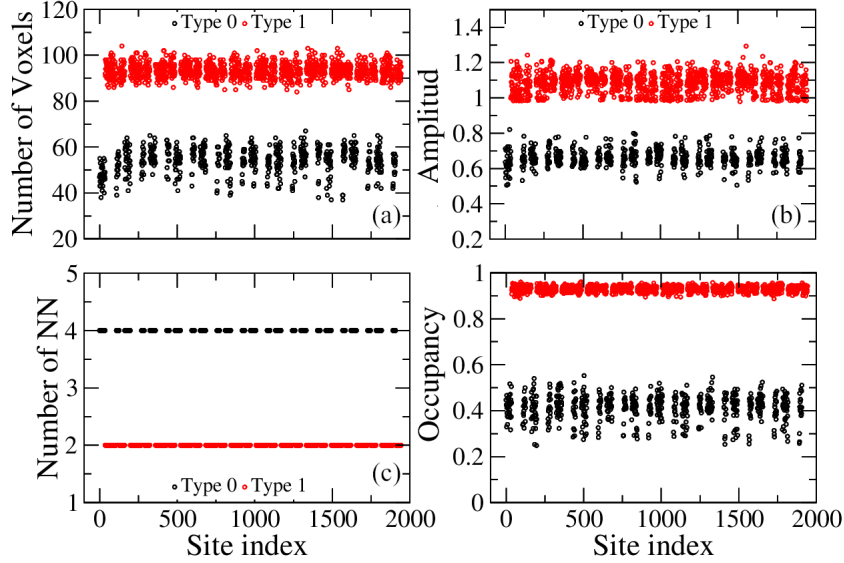

Figure S5: Site number of voxels (a), amplitude (b), number of nearest neighbors NN (c), and occupancy in cubic LLZO at 300K. Two types (Type 0 and Type 1) of sites are denoted by black and red dots, respectively.

Our methodology effectively allows us to identify the 1944  $\text{Li}^+$  sites of cubic LLZO within a  $3 \times 3 \times 3$  supercell, 648  $24d$   $T_d$  sites and 1296  $48g/96h$   $O_h$  sites. Moreover, the permissible range of Li-site occupancy falls within the limits of  $0.333 \leq O_{T_d} \leq 0.55$  and  $0.88 \leq O_{O_h} \leq 1.0$  [14]. These values align closely with those presented in Figure S5 (d) for Type 0 and Type 1 sites, respectively.

### S3.2 Radial occupancy

The radial occupancy  $rocc(r)$  between the sites Type 0 and Type 1 is defined as:

$$rocc_{0-1}(r) = \frac{1}{N_1^t} \sum_{i=1}^{N_0} \sum_{j=1}^{N_1} O_{ij}^1(r), \quad (3)$$

where  $O_{ij}^1(r)$  is the occupancy of the sites Type 1 at a distance  $r$  within a spherical shell of thickness  $dr$  from sites Type 0, as illustrated in Figure S6.  $N_0$  and  $N_1$  are the number of sites of Type 0 and Type 1, respectively, and  $N_1^t$  is the total number of Type 1 sites considered (i.e.,  $N_1^t = \sum_{i=1}^{N_0} N_{1_i}$ ). In this work, we have extended  $r$  up to  $10 \text{ \AA}$  using  $dr = 0.5 \text{ \AA}$ .



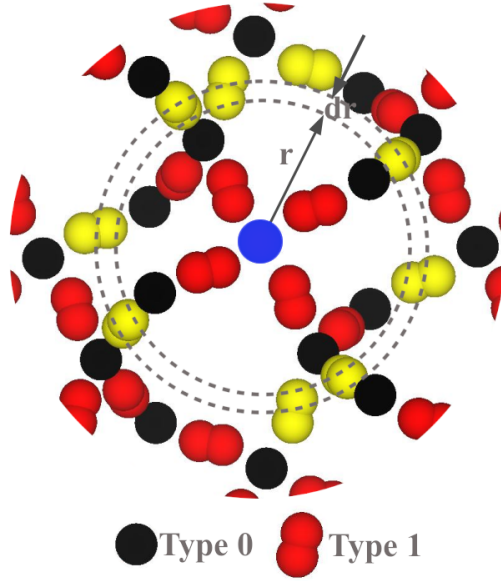

Figure S6: Schematic representation of radial occupancy,  $rocc(r)$ . Type 0 and Type 1 sites are represented by black and red spheres, respectively. Meanwhile, the blue and yellow spheres represent a specific site Type 0 and the sites at a distance  $r$  within a spherical shell of thickness  $dr$  from sites Type 0.

#### S4. $\text{Ga}_{0.15}/\text{Sc}_y\text{-LLZO}$ conventional ionic conductivity.

Figure S7 illustrates the calculated ionic conductivity of  $\text{Ga}_{0.15}/\text{Sc}_y\text{-LLZO}$  at  $T = 300$  with the conventional assumption that *all* Li-ions contribute equally to ionic conduction. Clearly, the behavior is somewhat erratic compared to that in Figure 3b of the main text, in which subdiffusive ions are not considered.

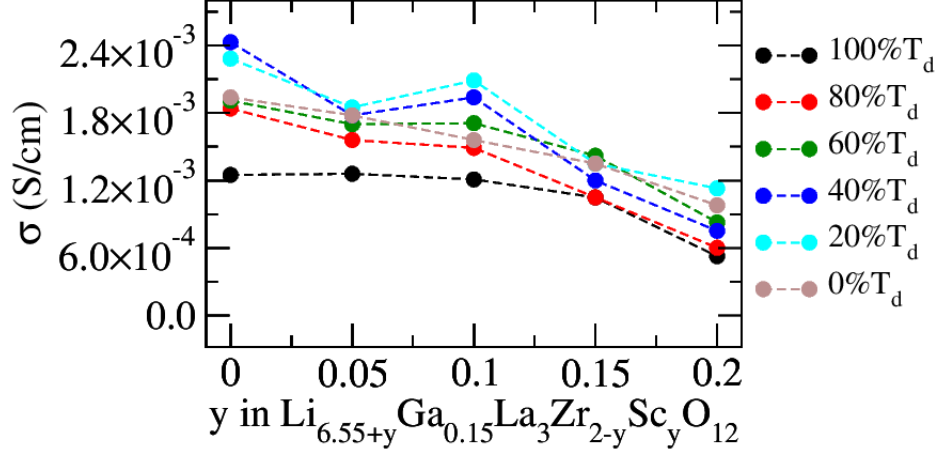

Figure S7: Calculated ionic conductivity, considering all Li ions as equals, of  $\text{Ga}_{0.15}/\text{Sc}_y\text{-LLZO}$  as a function of  $\text{Sc}^{3+}$  content ( $y$ ) for several  $\text{Ga}^{3+}$  distributions ( $\%T_d$ ) at  $T = 300$  K.

## S5. $\text{Ga}_{0.15}/\text{Sc}_y\text{-LLZO}$ occupancy limits.

Let us consider a cubic  $\text{Li}_7\text{La}_3\text{Zr}_2\text{O}_{12}$  unit cell (8 f.u.) with 56  $\text{Li}^+$  ions ( $N_{tot}$ ) distributed across 72  $\text{Li}^+$  sites (i.e. 24  $T_d$  and 48  $O_h$  sites). We can define  $N_{T_d}$  and  $N_{O_h}$  as the numbers of  $\text{Li}^+$  ions in  $T_d$  and  $O_h$  sites, respectively. Thus  $N_{tot} = N_{T_d} + N_{O_h}$ .

In the dual doped system  $\text{Li}_{6.55+y}\text{Ga}_{0.15}\text{La}_3\text{Zr}_{2-y}\text{Sc}_y\text{O}_{12}$ , if  $g$   $\text{Ga}^{3+}$  and  $s$   $\text{Sc}^{3+}$  ions are introduced in total, we have that

$$N_{T_d} + N_{O_h} = N_{tot} - 3g + s, \quad (4)$$

where each  $\text{Ga}^{3+}$  substitutes a  $\text{Li}^+$  ion and produces 2  $\text{Li}^+$ -vacancies, while a  $\text{Sc}^{3+}$  ion substitutes a  $\text{Zr}^{4+}$  ion and, therefore, introduces an additional  $\text{Li}^+$  ion due to charge compensation.

In addition, a  $\text{Ga}^{3+}$  ion may occupy either a  $T_d$  or an  $O_h$  site. Thus,  $g$  can be split into two parts,

$$g = g_{T_d} + g_{O_h}. \quad (5)$$

Let us assume that all the  $T_d$  sites are initially occupied. Consequently, all  $O_h$  sites will be empty, as depicted in Figure S8 (a).

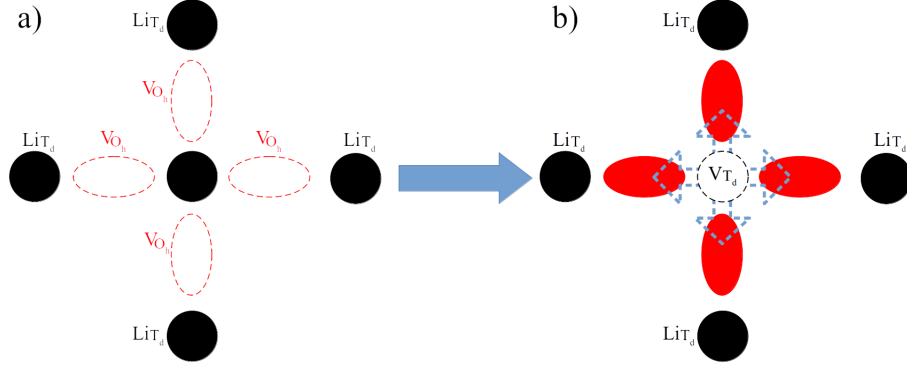

Figure S8: In these schematic representations, (a) illustrates a fully occupied  $T_d$  structure (full-black circles) with four adjacent empty  $O_h$  sites (empty-red ovals). (b) depicts the scenario where a  $Li^+$  ion is removed from a  $T_d$  site (empty-black circle), leading to the occupation of adjacent  $O_h$  sites.

If we remove one  $Li^+$  ion, then 4  $Li^+$  ions can now be put into the adjacent  $O_h$  sites. Thus, if  $x$   $T_d$  sites are left empty, we get

$$N_{T_d} = 24 - g_{T_d} - x \quad (6)$$

and

$$N_{O_h} = 4x. \quad (7)$$

By plugging Eqs. (5), (6) and (7) in Eq. (4), we obtain

$$N_{T_d} = \frac{5}{9} - \frac{9}{18C} \left( f_{T_d} - \frac{3}{4} \right) - \frac{s}{72} \quad (8)$$

and

$$N_{O_h} = \frac{1}{36C} (32 - g(3 - f_{T_d})) - s, \quad (9)$$

where  $f_{T_d}$  is the fraction of Ga in  $T_d$  sites, defined as  $f_{T_d} = (g - g_{O_h})/g$ , and  $C$  is the number of unit cells in the structure.

Finally, the maximum and minimum limits for the occupation of the  $T_d$  and  $O_h$  sites is given by

$$O_{T_d} = \frac{N_{T_d}}{S_{T_d}} \quad (10)$$

and

$$O_{O_h} = \frac{N_{O_h}}{S_{O_h}}, \quad (11)$$

where  $S_{T_d}$  and  $S_{O_h}$  are the total numbers of sites of each type, respectively. In the case of a unit cell, those correspond to  $S_{T_d} = 24$  for  $T_d$  and  $S_{O_h} = 48$  for  $O_h$ .

## S6. Ga<sub>0.15</sub>/Sc<sub>0.0</sub>-LLZO density maps.

Figure S9 shows the density maps of the Li subset  $Li_{hm}$  in the (100), (001), and (001) planes for the system Ga<sub>0.15</sub>/Sc<sub>0.0</sub>-LLZO in the 0% $T_d$  and 100% $T_d$  configurations (indicated above the plots) at 300 K.

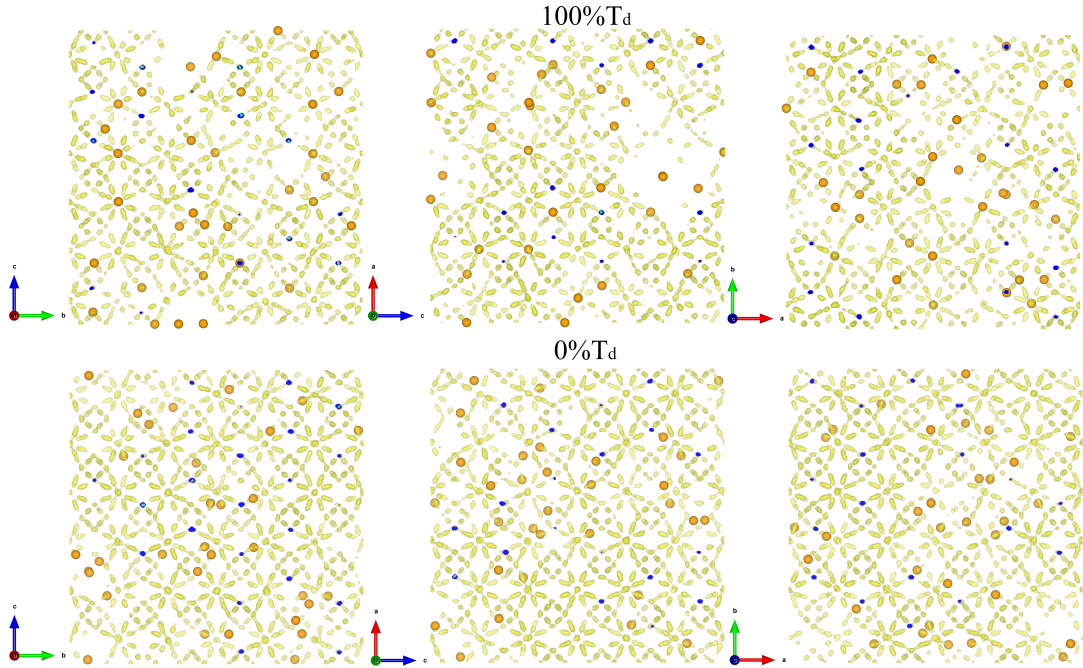

Figure S9: Density maps of  $Li_{hm}$  ions in the (100), (001), and (001) planes for Ga<sub>0.15</sub>/Sc<sub>0.0</sub>-LLZO with 0% $T_d$  (a) and 100% $T_d$  (b) at 300K.  $Ga^{3+}$  ions are represented as orange spheres.

## References

- [1] L. Buannic, B. Orayech, J.-M. López Del Amo, J. Carrasco, N. A. Katcho, F. Aguesse, W. Manalastas, W. Zhang, J. Kilner, and

- A. Llordés, “Dual substitution strategy to enhance  $\text{Li}^+$  ionic conductivity in  $\text{Li}_7\text{La}_3\text{Zr}_2\text{O}_{12}$  solid electrolyte,” *Chemistry of Materials*, vol. 29, no. 4, pp. 1769–1778, 2017.
- [2] R. Jalem, M. Rushton, W. Manalastas, M. Nakayama, T. Kasuga, J. A. Kilner, and R. W. Grimes, “Effects of gallium doping in garnet-type  $\text{Li}_7\text{La}_3\text{Zr}_2\text{O}_{12}$  solid electrolytes,” *Chem. Mater.*, vol. 27, no. 8, pp. 2821–2831, 2015.
- [3] R. Murugan, V. Thangadurai, and W. Weppner, “Fast lithium ion conduction in garnet-type  $\text{Li}_7\text{La}_3\text{Zr}_2\text{O}_{12}$ ,” *Angewandte Chemie International Edition*, vol. 46, no. 41, pp. 7778–7781, 2007.
- [4] M. A. Howard, O. Clemens, E. Kendrick, K. S. Knight, D. C. Apperley, P. A. Anderson, and P. R. Slater, “Effect of Ga incorporation on the structure and Li ion conductivity of  $\text{La}_3\text{Zr}_2\text{Li}_7\text{O}_{12}$ ,” *Dalton Transactions*, vol. 41, pp. 12048–12053, 2012.
- [5] D. Rettenwander, C. A. Geiger, M. Tribus, P. Tropper, and G. Amthauer, “A synthesis and crystal chemical study of the fast ion conductor  $\text{Li}_{7-3x}\text{Ga}_x\text{La}_3\text{Zr}_2\text{O}_{12}$  with  $x = 0.08$  to  $0.84$ ,” *Inorganic Chemistry*, vol. 53, no. 12, pp. 6264–6269, 2014.
- [6] J. Wolfenstine, J. Ratchford, E. Rangasamy, J. Sakamoto, and J. L. Allen, “Synthesis and high Li-ion conductivity of Ga-stabilized cubic  $\text{La}_3\text{Zr}_2\text{Li}_7\text{O}_{12}$ ,” *Materials Chemistry and Physics*, vol. 134, no. 2-3, pp. 571–575, 2012.
- [7] J.-F. Wu, E.-Y. Chen, Y. Yu, L. Liu, Y. Wu, W. K. Pang, V. K. Peterson, and X. Guo, “Gallium-doped  $\text{Li}_7\text{La}_3\text{Zr}_2\text{O}_{12}$  garnet-type electrolytes with high lithium-ion conductivity,” *ACS Appl. Mater. Interfaces*, vol. 9, no. 2, pp. 1542–1552, 2017.
- [8] C. Bernuy-López, W. Manalastas, J. M. López del Amo, A. Aguadero, F. Aguesse, and J. A. Kilner, “Atmosphere controlled processing of gasubstituted garnets for high Li-ion conductivity ceramics,” *Chemistry of Materials*, vol. 26, no. 12, pp. 3610–3617, 2014.
- [9] X. Huang, J. Su, Z. Song, T. Xiu, J. Jin, M. E. Badding, and Z. Wen, “Synthesis of Ga-doped  $\text{Li}_7\text{La}_3\text{Zr}_2\text{O}_{12}$  solid electrolyte with high  $\text{Li}^+$  ion conductivity,” *Ceramics International*, vol. 47, no. 2, pp. 2123–2130, 2021.

- [10] D. Rettenwander, G. Redhammer, F. Preishuber-Pflugl, L. Cheng, L. Miara, R. Wagner, A. Welzl, E. Suard, M. M. Doeff, M. Wilkening, J. Fleig, and G. Amthauer, “Structural and electrochemical consequences of al and ga cosubstitution in  $\text{li}_7\text{la}_3\text{zr}_2\text{o}_{12}$  solid electrolytes,” *Chemistry of Materials*, vol. 28, no. 7, pp. 2384–2392, 2016.
- [11] E. Yi, W. Wang, J. Kieffer, and R. Laine, “Key parameters governing the densification of cubic- $\text{li}_7\text{la}_3\text{zr}_2\text{o}_{12}$   $\text{li}^+$  conductors,” *J. Power Sources*, vol. 352, pp. 156–164, 2017.
- [12] Y. Matsuda, A. Sakaida, K. Sugimoto, D. Mori, Y. Takeda, O. Yamamoto, and N. Imanishi, “Sintering behavior and electrochemical properties of garnet-like lithium conductor  $\text{Li}_{6.25}\text{M}_{0.25}\text{La}_3\text{Zr}_2\text{O}_{12}$  (M:  $\text{Al}^{3+}$  and  $\text{Ga}^{3+}$ ),” *Solid State Ionics*, vol. 311, pp. 69 – 74, 2017.
- [13] C. Chen, Z. Lu, and F. Ciucci, “Data mining of molecular dynamics data reveals li diffusion characteristics in garnet  $\text{Li}_7\text{La}_3\text{Zr}_2\text{O}_{12}$ ,” *Sci Rep*, vol. 7, no. 1, p. 40769, 2017.
- [14] S. Adams and R. P. Rao, “Ion transport and phase transition in  $\text{li}_{7-x}\text{la}_3\text{zr}_{2-x}\text{m}_x\text{o}_{12}$  ( $\text{m} = \text{ta}^{5+}, \text{nb}^{5+}, x = 0, 0.25$ ),” *Journal of Materials Chemistry*, vol. 22, pp. 1426–1434, 2012.
